# Supplementary material for: FTIR analysis of GPCR activation using azido probes
Source: Springer Nature journal article supplement (doi:10.1038/nchembio.167), 2009-04-26
Supplement: 41589_2009_BFnchembio167_MOESM1_ESM.mol [file 41589_2009_BFnchembio167_MOESM1_ESM.mol]

  ChemDraw04100911012D

 16 16  0  0  0  0  0  0  0  0999 V2000
   -1.7838   -0.6208    0.0000 C   0  0  0  0  0  0  0  0  0  0  0  0
   -1.7838    0.2042    0.0000 C   0  0  0  0  0  0  0  0  0  0  0  0
   -2.4958   -1.0319    0.0000 N   0  0  0  0  0  0  0  0  0  0  0  0
   -1.0693    0.6167    0.0000 C   0  0  0  0  0  0  0  0  0  0  0  0
   -0.3548    0.2042    0.0000 C   0  0  0  0  0  0  0  0  0  0  0  0
    0.3596    0.6167    0.0000 C   0  0  0  0  0  0  0  0  0  0  0  0
    0.3596    1.4417    0.0000 C   0  0  0  0  0  0  0  0  0  0  0  0
   -0.3548    1.8542    0.0000 C   0  0  0  0  0  0  0  0  0  0  0  0
   -1.0693    1.4417    0.0000 C   0  0  0  0  0  0  0  0  0  0  0  0
    1.0717    1.8528    0.0000 N   0  0  0  0  0  0  0  0  0  0  0  0
    1.7838    1.4417    0.0000 N   0  3  0  0  0  0  0  0  0  0  0  0
    2.4958    1.0306    0.0000 N   0  5  0  0  0  0  0  0  0  0  0  0
   -2.3671   -0.0375    0.0000 H   0  0  0  0  0  0  0  0  0  0  0  0
   -1.0717   -1.0319    0.0000 C   0  0  0  0  0  0  0  0  0  0  0  0
   -0.3596   -0.6208    0.0000 O   0  0  0  0  0  0  0  0  0  0  0  0
   -1.0717   -1.8542    0.0000 O   0  0  0  0  0  0  0  0  0  0  0  0
  1  2  1  1      
  1 14  1  0      
  1  3  1  0      
  2  4  1  0      
  4  5  2  0      
  5  6  1  0      
  6  7  2  0      
  7  8  1  0      
  8  9  2  0      
  9  4  1  0      
  7 10  1  0      
 10 11  2  0      
 11 12  2  0      
  1 13  1  6      
 14 15  2  0      
 14 16  1  0      
M  CHG  2  11   1  12  -1
M  END
